# Supplementary material for: Extinct type of human parvovirus B19 persists in tonsillar B cells
Source: PubMed Central journal article supplement (PMC5382274; doi:10.1038/ncomms14930), 2017-04-04
Supplement: ncomms14930-s1.pdf [file ncomms14930-s1.pdf]

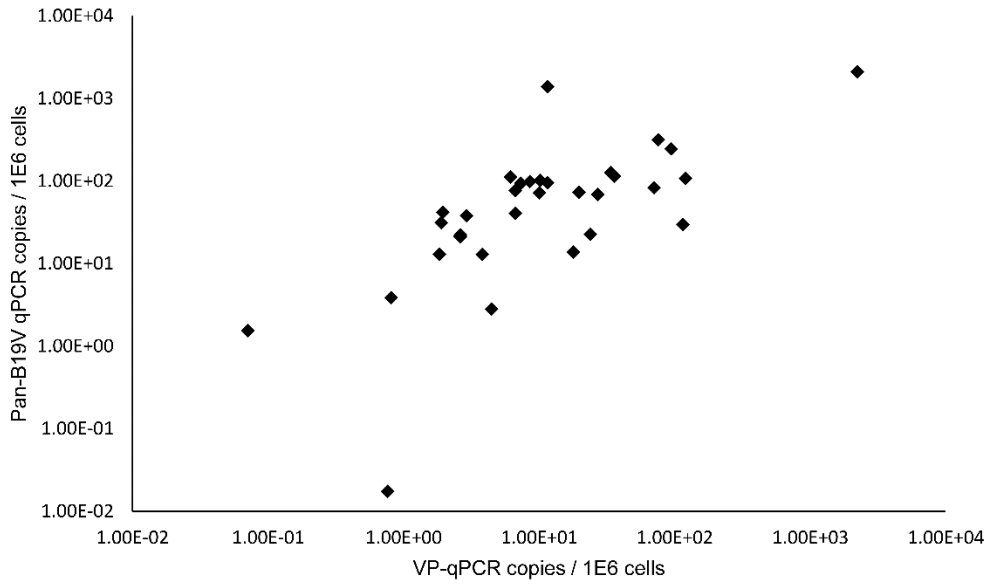

**Supplementary Figure 1.** B19V loads determined by Pan-B19V-qPCR and VP-qPCR. The B19V-DNA copy numbers in B cells of collagenase treated tonsils (n=33) were determined with two qPCRs targeting distinct genomic regions (NS1 and VP1) and normalized to cell numbers with the human single copy gene *RNase P*.

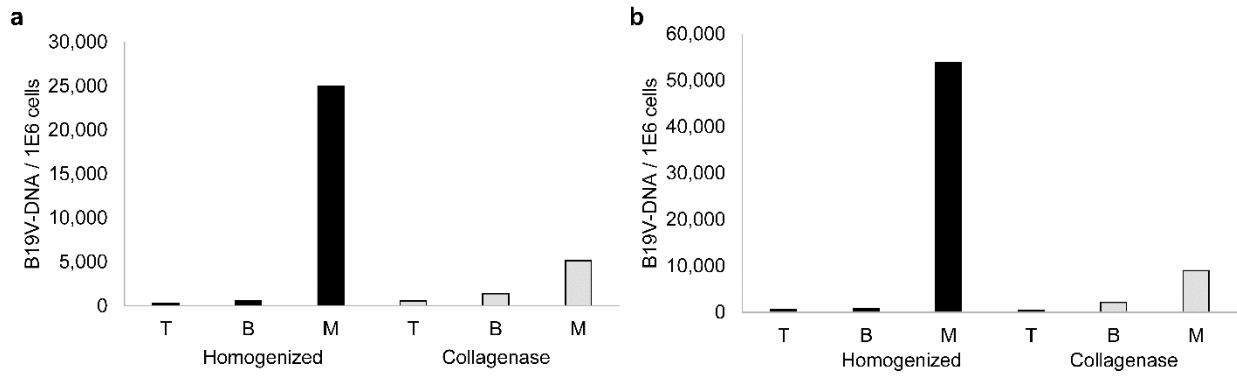

**Supplementary Figure 2. B19V-DNA quantities in lymphoid fractions from two children.**

B19V-DNA copies in T, B and monocytic cells following homogenization (black) or collagenase digestion (light grey) in a 6-year old **(a)** and an 8-year old patient **(b)** with the highest copy number in the cohort. Represented are B19V-DNA copies normalized to cell numbers with the human single-copy gene *RNase P*.

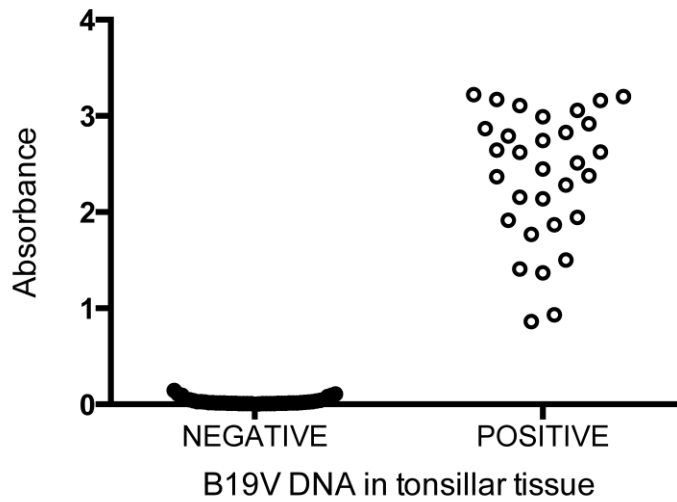

**Supplementary Figure 3. B19V genoprevalence and seroprevalence.** B19V genoprevalence (31 B19V-DNA positive vs 43 B19V-DNA negative individuals) in tonsillar tissues was strictly correlated to IgG serostatus in this study cohort.

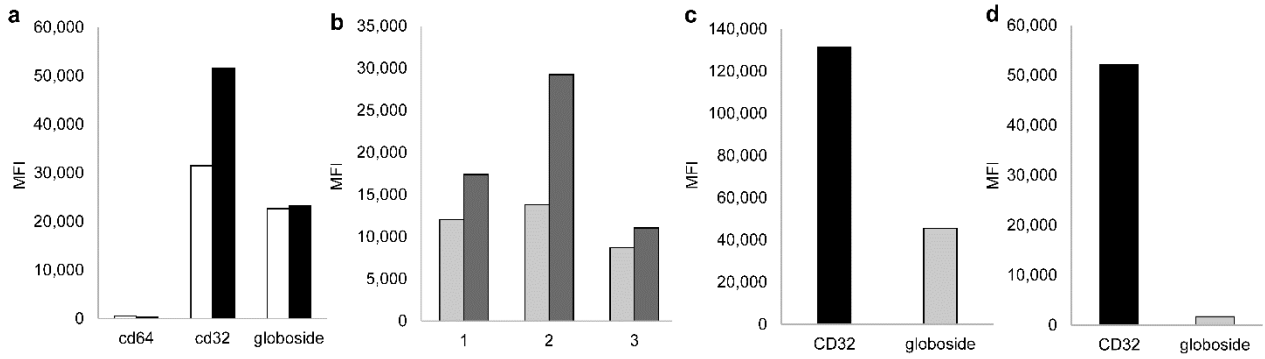

**Supplementary Figure 4. Cell surface marker expression in cell lines and primary tonsillar B cells.** **a**) Fc-receptors CD64 and CD32 and globoside expression levels in GM12878 (white bars) and Raji cells (black bars), as measured by flow cytometry; **b**) Globoside levels in total cell suspensions resulting from homogenization (light grey) or collagenase treated (dark grey) tissues from three seronegative individuals (x axis); **c**) CD32 (black) and globoside (light grey) expression in primary tonsillar B cells from one seronegative individual. **d**) CD32 (black) and globoside (light grey) expression in circulating B cells from venous blood of one seropositive staff member.

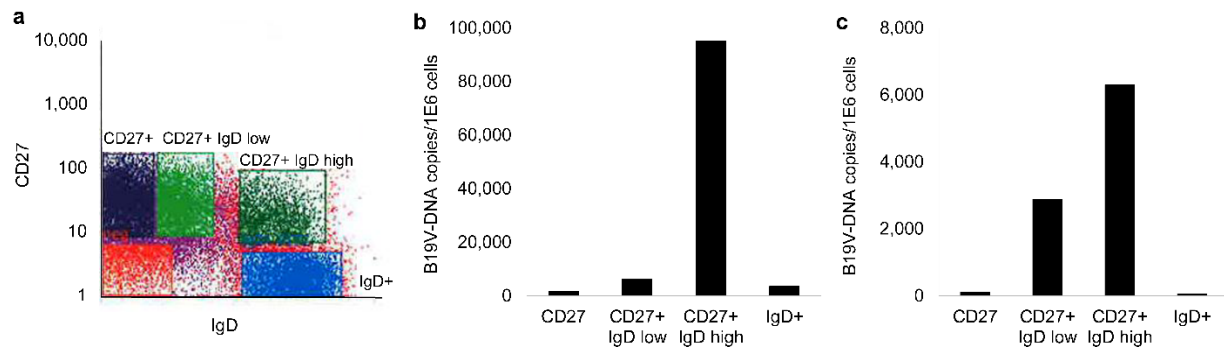

**Supplementary Figure 5. Cell sorting of primary tonsillar B cells.** **a)** Collagenase-treated tonsillar cell suspensions from 12 individuals were gated for CD19 expression and sorted according to their expression of CD27 (memory) or IgD (naive) cell surface markers. Represented are the four sub-populations collected from one of the individuals. **b)** and **c)** represent B19V-DNA copies in tonsillar B cell sub-fractions from two children of ages 8 and 6, respectively.

**Supplementary Table 1. B19V genotype prevalence in the study cohort**

| Patient | Year of birth | Age <sup>1</sup> | B19V genotype | nt similarity to ref. seq. <sup>2</sup> |
|---------|---------------|------------------|---------------|-----------------------------------------|
| 1       | 1946          | 69               | <b>GT2</b>    | 100 %                                   |
| 2       | 1947          | 68               | <b>GT2</b>    | 100 %                                   |
| 3       | 1962          | 52               | <b>GT2</b>    | 100 %                                   |
| 4       | 1964          | 50               | GT1           | 100 %                                   |
| 5       | 1968          | 46               | <b>GT2</b>    | 100 %                                   |
| 6       | 1970          | 45               | GT1           | 100 %                                   |
| 7       | 1974          | 40               | GT1           | 100 %                                   |
| 8       | 1978          | 37               | GT1           | 100 %                                   |
| 9       | 1978          | 37               | GT1           | 100 %                                   |
| 10      | 1980          | 35               | GT1           | 100 %                                   |
| 11      | 1980          | 34               | GT1           | 100 %                                   |
| 12      | 1980          | 34               | GT1           | 100 %                                   |
| 13      | 1980          | 34               | GT1           | 100 %                                   |
| 14      | 1981          | 33               | GT1           | 100 %                                   |
| 15      | 1981          | 33               | GT1           | 98.1 %                                  |
| 16      | 1982          | 32               | GT1           | 100 %                                   |
| 17      | 1984          | 31               | GT1           | 99.4 %                                  |
| 18      | 1986          | 29               | GT1           | 100 %                                   |
| 19      | 1986          | 29               | GT1           | 100 %                                   |
| 20      | 1987          | 28               | GT1           | 99.4 %                                  |
| 21      | 1987          | 27               | GT1           | 100 %                                   |
| 22      | 1990          | 24               | GT1           | 100 %                                   |
| 23      | 1992          | 22               | GT1           | 100 %                                   |
| 24      | 1992          | 22               | GT1           | 100 %                                   |
| 25      | 1994          | 20               | GT1           | 99.4 %                                  |
| 26      | 1994          | 20               | GT1           | 100 %                                   |
| 27      | 1995          | 20               | GT1           | 100 %                                   |
| 28      | 1996          | 19               | GT1           | 100 %                                   |
| 29      | 1998          | 17               | GT1           | 100 %                                   |
| 30      | 1998          | 17               | GT1           | 100 %                                   |
| 31      | 2006          | 8                | GT1           | 100 %                                   |
| 32      | 2008          | 6                | GT1           | 100 %                                   |
| 33      | 2009          | 6                | GT1           | 100 %                                   |

<sup>1</sup> Age at the time of sampling

<sup>2</sup> Nucleotide similarity to the reference sequences FN598217.1 (genotype 1) and AY044266.2 (genotype 2).

**Supplementary Table 2. EBV and B19V quantities in PBMCs and circulating B cells**

| Study subject | EBV DNA<br>PBMC* | EBV DNA<br>B cell* | B19V DNA<br>PBMC* | B19V DNA<br>B cell* | B19V IgG positive |
|---------------|------------------|--------------------|-------------------|---------------------|-------------------|
| 1             | 1.15E+02         | 1.06E+03           | 0.00E+00          | 0.00E+00            | Yes               |
| 2             | 0.00E+00         | 0.00E+00           | 0.00E+00          | 0.00E+00            | Yes               |
| 3             | 0.00E+00         | 1.20E+02           | 0.00E+00          | 0.00E+00            | Yes               |
| 4             | 3.26E+01         | 0.00E+00           | 0.00E+00          | 0.00E+00            | Yes               |
| 5             | 0.00E+00         | 0.00E+00           | 0.00E+00          | 0.00E+00            | Yes               |
| 6             | 7.99E+01         | 2.62E+02           | 0.00E+00          | 0.00E+00            | Yes               |
| 7             | 0.00E+00         | 0.00E+00           | 0.00E+00          | 0.00E+00            | Yes               |
| 8             | 0.00E+00         | 0.00E+00           | 0.00E+00          | 0.00E+00            | No                |

\* viral DNA copies / 1E6 cells

**Supplementary Table 3. Sequences of primers and probes used in this study**

| PCR                  | Target                        | Oligo name | Sequence 5'-3'                   | References                                        |
|----------------------|-------------------------------|------------|----------------------------------|---------------------------------------------------|
| <b>Pan-B19V qPCR</b> | Human parvovirus B19 NS1-gene | Fwd        | CCACTATGAAAAGTGGGCAATA           | Toppinen <i>et al.</i><br>J Virol Methods<br>2015 |
|                      |                               | Rev        | GCTGCTTTCAGTGTCTTCA              |                                                   |
|                      |                               | Probe      | FAM-AATGCAGATGCCCTCCACCCAG-BHQ1  |                                                   |
| <b>VP-qPCR</b>       | Human parvovirus B19 VP1-gene | Fwd        | CATGCCTTATCAYCCAGTARCAGT         | Toppinen <i>et al.</i><br>Sci Rep 2015            |
|                      |                               | Rev        | AGGCCAACATAGTTAGTACCG            |                                                   |
| <b>EBV-qPCR</b>      | Epstein-Barr virus BALF5-gene | Fwd        | CGGAAGCCCTCTGGACTTC              | Aalto <i>et al.</i><br>J Clin Virol<br>2003       |
|                      |                               | Rev        | CCCTGTTTATCCGATGGAATG            |                                                   |
|                      |                               | Probe      | FAM-TGTACACGCACGAGAAATGCGCC-BHQ1 |                                                   |
| <b>RNase P -qPCR</b> | Human RNaseP-gene             | Fwd        | GAGGGAAGCTCATCAGTGGGG            | Toppinen <i>et al.</i><br>J Virol Methods<br>2015 |
|                      |                               | Rev        | CCCTAGTCTCAGACCTTCCCAAG          |                                                   |
|                      |                               | Probe      | FAM-AGTGCGTCTGTCACTCCACTC-TAM    |                                                   |

BHQ=Black Hole Quencher

Y=C or T

R=A or G
